# Supplementary material for: Fabrication of pyrenetetrasulfonate/layered double hydroxide ultrathin films and their application in fluorescence chemosensors
Source: Royal Society of Chemistry journal article supplement (doi:10.1039/c1jm00073j), 2011-01-01
Supplement: c1jm00073j.pdf [file c1jm00073j.pdf]

**Electronic Supplementary Information for**  
**Fabrication of Pyrenetetrasulfonate/Layered Double Hydroxide**  
**Ultrathin Films and their Application in Fluorescence Chemosensors**

**Wenying Shi, Yanjun Lin, Xianggui Kong, Shitong Zhang, Yankun Jia, Min Wei,\* David  
G. Evans and Xue Duan**

*State Key Laboratory of Chemical Resource Engineering, Beijing University of Chemical  
Technology, Beijing 100029, P. R. China*

**CORRESPONDING AUTHOR FOOTNOTE**

\* Corresponding author. Phone: +86-10-64412131. Fax: +86-10-64425385. E-mail:  
weimin@mail.buct.edu.cn.

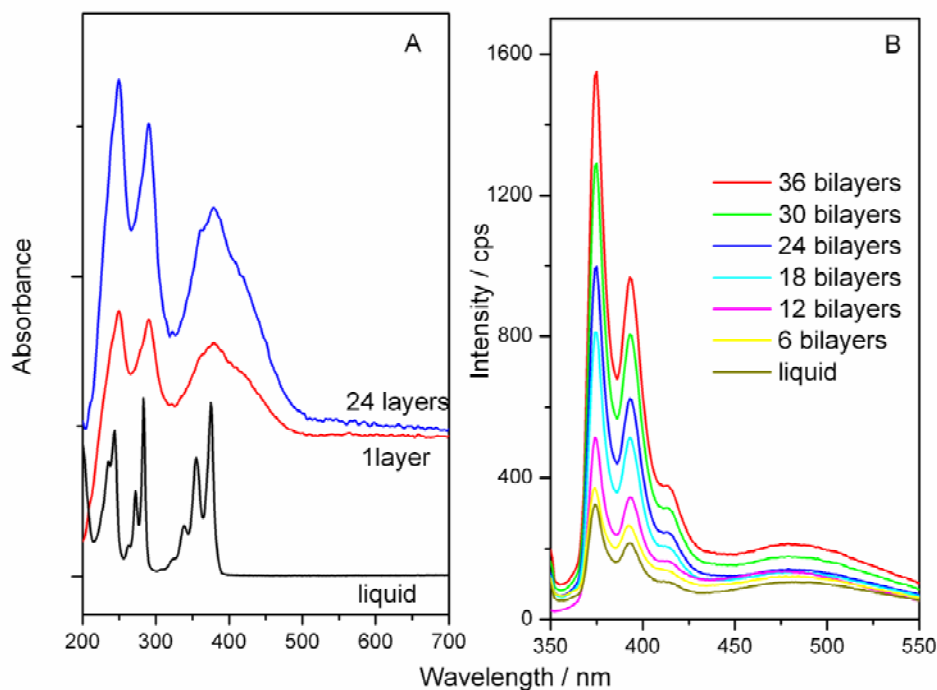

**Figure S1.** (A) The UV-vis absorption spectra and (B) emission spectra of the pristine PTS in solution and PTS/LDH UTFs.

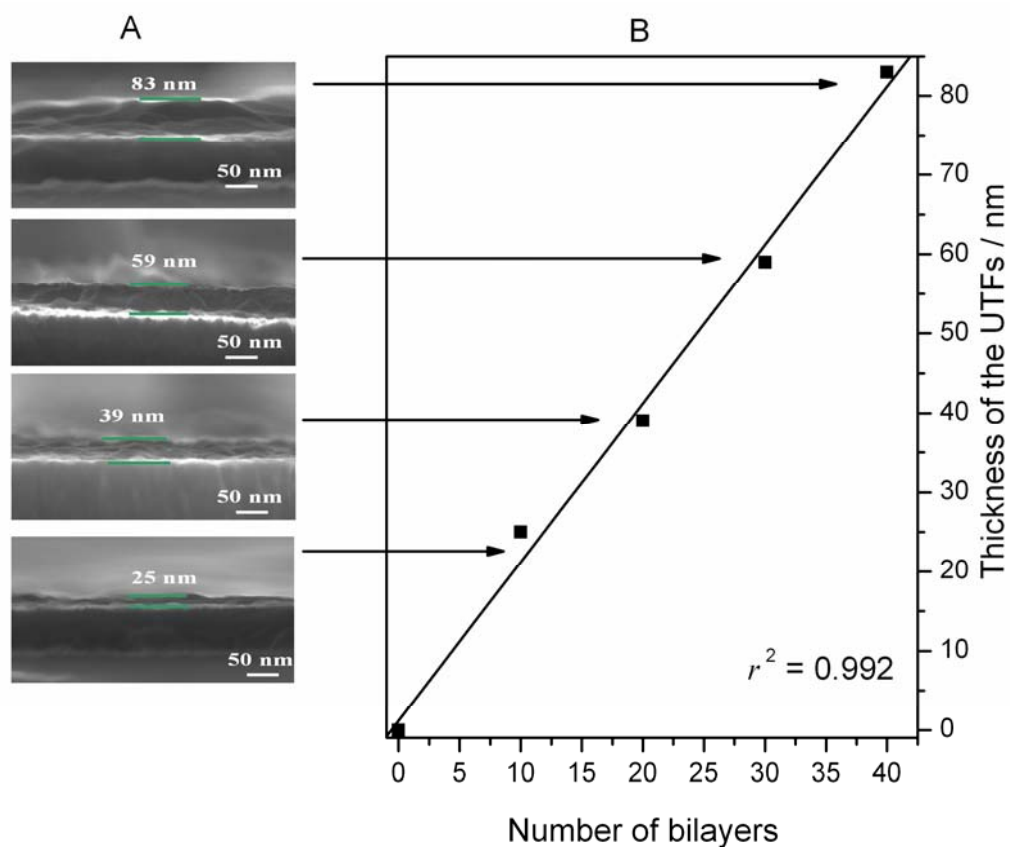

**Figure S2.** (A) Side-view of SEM images for the (PTS/LDH)<sub>n</sub> UTFs with  $n=10$ , 20, 30 and 40 respectively; (B) thickness of these UTFs vs.  $n$ .

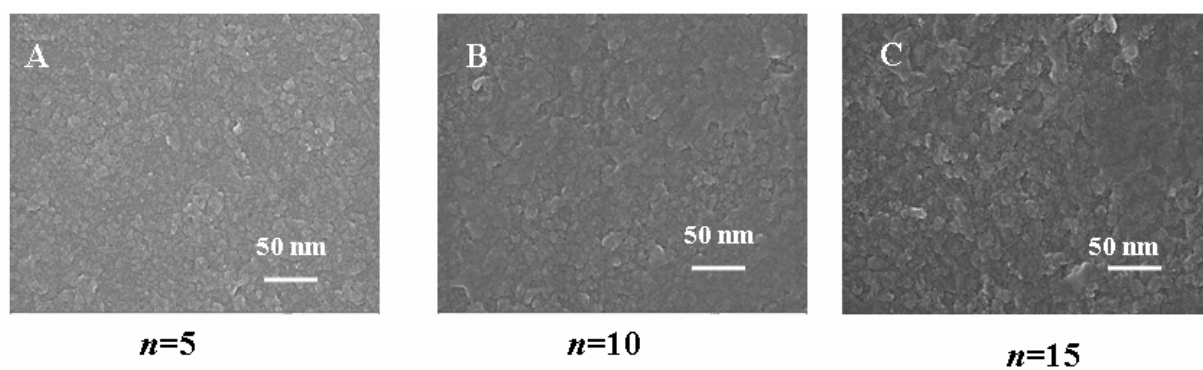

**Figure S3.** Top-view of SEM images of the (PTS/LDH)<sub>n</sub> UTFs for (A)  $n=5$ , (B)  $n=10$  and (C)  $n=15$ .

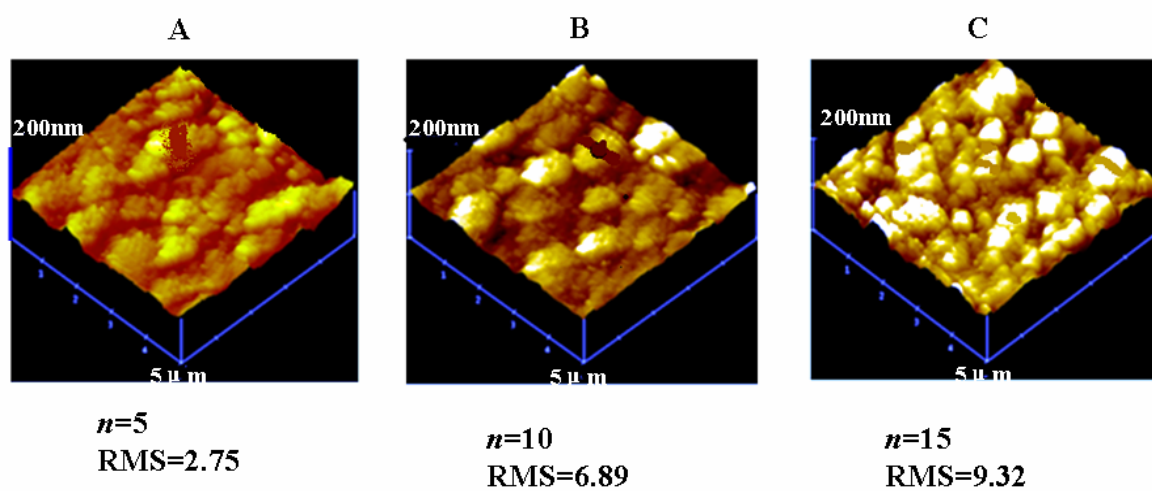

**Figure S4.** AFM images of the (PTS/LDH)<sub>n</sub> UTFs for (A) *n* = 5, (B) *n* = 10 and (C) *n* = 15.

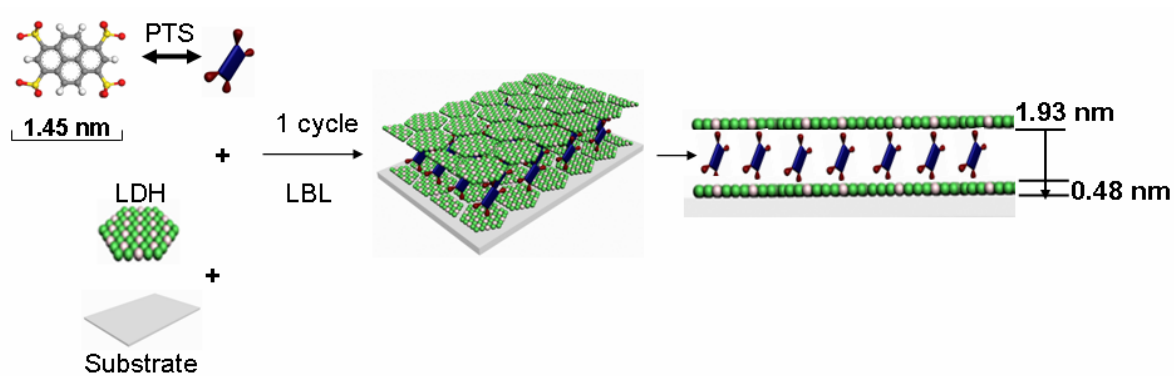

**Figure S5.** Schematic representation for an ideal assembly and structure of PTS/LDH UTF (Zn green, Al pink, H white, S yellow, O red, C grey).

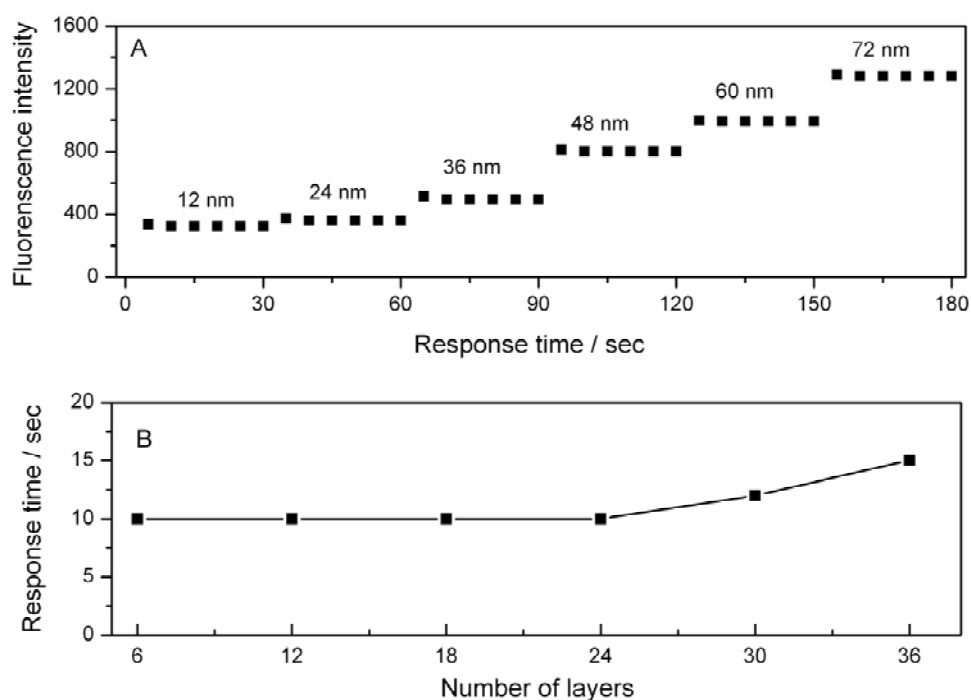

**Figure S6.** (A) Response time of the chemosensor for  $\text{Cu}^{2+}$  ( $0.2 \mu\text{M}$ ) with different film thickness. The interval time of each measurement is 5 s. The excitation wavelength is 340 nm and monitor wavelength is 375 nm. (B) Correlation between the response time and  $n$ .

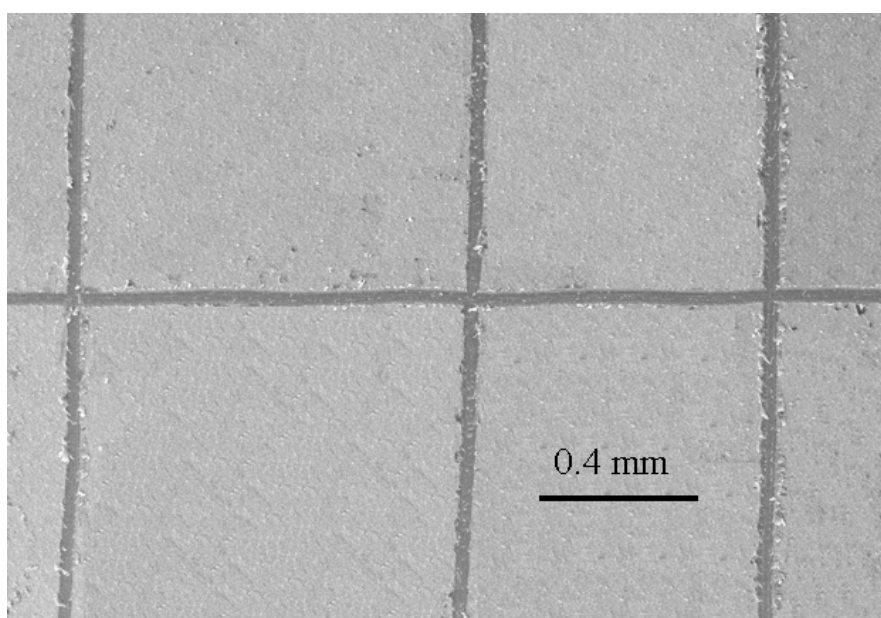

**Figure S7.** SEM image of the  $(\text{PTS/LDH})_{24}$  UTF tested for adhesion to the substrate.

**Table S1:** Fluorescence Decay Data of PTS in Solution and the (PTS/LDH)<sub>n</sub> UTFs.

| $n$                                       | $x$ | $\tau_i$ (ns) | $A_i$ (%) | $\langle\tau\rangle$ (ns) | Chi <sup>2</sup> |
|-------------------------------------------|-----|---------------|-----------|---------------------------|------------------|
| 6                                         | 2   | 128.6         | 46.6      | 113.5                     | 1.55             |
|                                           |     | 100.3         | 53.4      |                           |                  |
| 12                                        | 2   | 108.6         | 40.4      | 116.3                     | 1.14             |
|                                           |     | 121.5         | 59.6      |                           |                  |
| 18                                        | 2   | 106.9         | 56.4      | 120.4                     | 1.25             |
|                                           |     | 137.9         | 43.6      |                           |                  |
| 24                                        | 2   | 130.5         | 43.9      | 128.6                     | 1.36             |
|                                           |     | 127.1         | 56.1      |                           |                  |
| 30                                        | 2   | 124.3         | 41.9      | 120.1                     | 1.54             |
|                                           |     | 117.1         | 58.1      |                           |                  |
| PTS solution<br>/10 <sup>-5</sup> mol/L   | 1   | 80.2          | 100       | 80.2                      | 1.32             |
| (PTS/LDH) <sub>24</sub> -Cu <sup>2+</sup> | 2   | 130.5         | 52.3      | 127.3                     | 1.52             |
|                                           |     | 123.8         | 47.7      |                           |                  |

$n$  is the number of bilayer;  $x$  is the series of exponential fit;  $\tau_i$  is the fluorescence lifetime;  $A_i$  is the preexponential factor related with the statistical weights of each exponential;  $\langle\tau\rangle$  is the intensity average lifetime. The goodness of fit is indicated by the value of Chi<sup>2</sup>.
